# Supplementary material for: A photoenhanced oxidation of amino acids and the cross-linking of lysozyme mediated by tetrazolium salts
Source: Royal Society of Chemistry journal article supplement (doi:10.1039/d0cp04887a), 2021-01-01
Supplement: d0cp04887a1.pdf [file d0cp04887a1.pdf]

## Supporting Information

# Photoenhanced Oxidation of Amino Acids and Cross-linking of Lysozyme mediated by Tetrazolium Salts

Jianfeng Zhao,<sup>[a,c]</sup> Ruixue Zhu,<sup>[a,d]</sup> Xiting Zhang,<sup>[a]</sup> Bowu Zhang,\*<sup>[b,c]</sup> Yancheng Liu,<sup>[c]</sup> Yuanchun Li,<sup>[a]</sup> Wenfeng Wang,\*<sup>[c]</sup> and David Lee Phillips\*<sup>[a]</sup>

- 
- [a] Dr. J.F. Zhao, Dr. R.X. Zhu, Dr. X.T. Zhang, Miss Y.C. Li, Prof. Dr. D. L. Phillips  
Department of Chemistry, The University of Hong Kong, Pokfulam Road, Hong Kong 11111, P. R. China  
E-mails: B.W. Zhang, [zhangbowu@shnu.edu.cn](mailto:zhangbowu@shnu.edu.cn), W.F. Wang, [wangwenfeng@sinap.ac.cn](mailto:wangwenfeng@sinap.ac.cn), D.L. Phillips, [phillips@hku.hk](mailto:phillips@hku.hk)
- [b] Prof. Dr. B.W. Zhang,  
The Education Ministry Key Lab of Resource Chemistry, Shanghai Key Lab of Rare Earth Functional Materials, College of Chemistry and Materials Science, Shanghai Normal University, No. 100, Guilin Road, Shanghai, 200234, China
- [c] Dr. J.F. Zhao, Dr. Y.C. Liu, Prof. Dr. B.W. Zhang, Prof. W.F. Wang  
Shanghai Institute of Applied Physics, Chinese Academy of Sciences, No. 2019, Jialuo Road, Jiading District, Shanghai 201800, P. R. China
- [d] Dr. R.X. Zhu  
School of Physical Science and Technology, Shanghai Tech University, Shanghai 201210, P. R. China

## Supporting figures

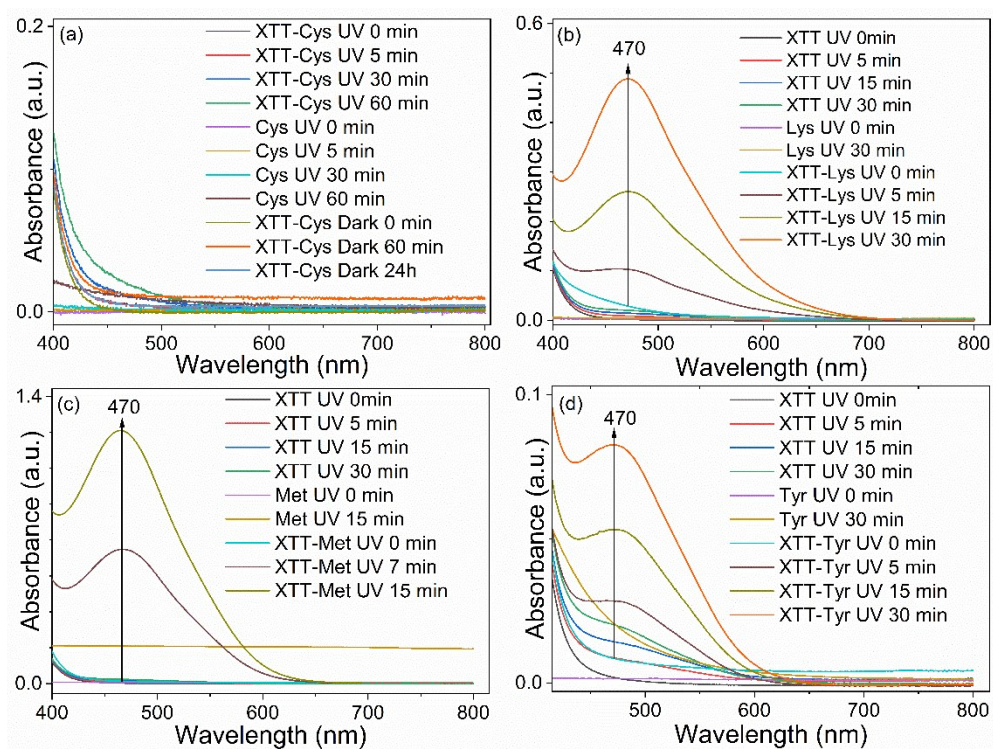

**Fig. S1.** Aqueous solution of XTT and/ or (a) L-Cysteine (Cys), (b) L-Lysine (Lys), (c) L-Methionine (Met) and (d) DL-Tyrosine (Tyr) under UV irradiation or in the dark. UV accelerated the yield of XTT-formazan (characteristic absorption at 470 nm) with the presence of Lys, Met and Tyr, but not for Cys.

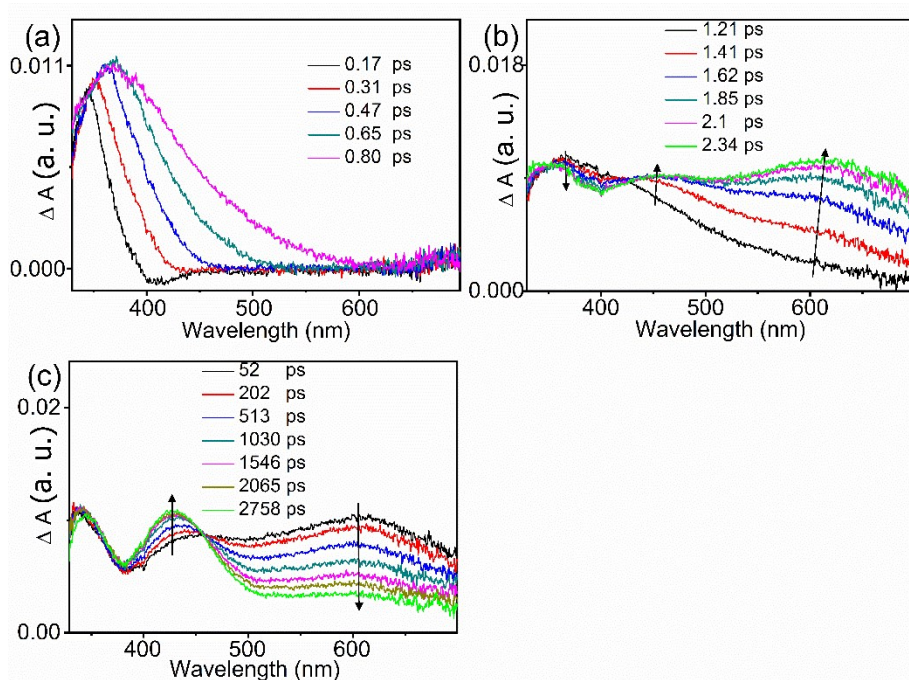

**Fig. S2** The fs-TA spectra of Trp in ACN/H<sub>2</sub>O mixed solution.

The band centered at 350 nm is due to Trp-S<sub>n</sub> and this relaxed into Trp-S<sub>1</sub> (the lowest excited states of the singlets, denoted as S<sub>1</sub> (LA)<sup>1</sup>) with absorption bands at 330, 450 and ~550-600 nm, Trp-S<sub>1</sub> (LA) transformed into Trp-T<sub>1</sub> with absorption bands located at 350 and 425 nm. So after photoexcitation, the ground state of Trp molecules is first excited to a higher excited singlet state (Trp-S<sub>n</sub>) and then transforms into the excited triplet state (Trp-T<sub>1</sub>) thereafter, which is in accordance with literature reports.<sup>2</sup>

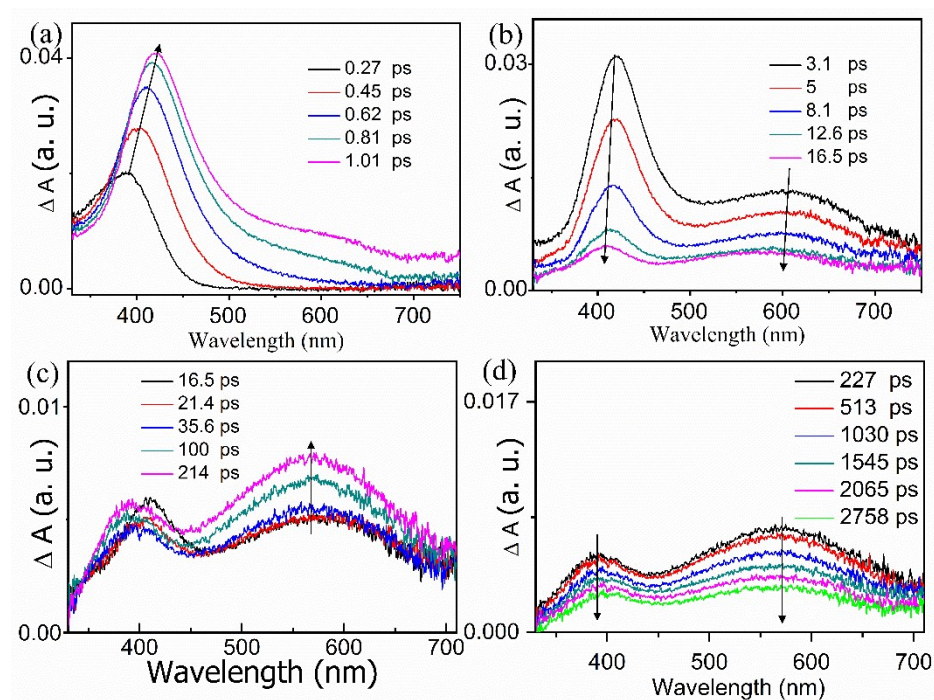

**Fig. S3** fs-TA spectra of NBT in ACN/H<sub>2</sub>O (volume ratio, 1:1) mixed solution obtained after 267 nm laser irradiation of the samples. (a), (b), (c) and (d) represent for the fs-TA spectra evolved with time delay after laser dose, respectively.

1. J. Leonard, D. Sharma, B. Szafarowicz, K. Torgasin and S. Haacke, *Phys. Chem. Chem. Phys.*, 2010, **12**, 15744-15750.
2. D. V. Bent and E. Hayon, *J. Am. Chem. Soc.*, 1975, **97**, 2612-2619.
